# Supplementary material for: Short-Time β-Alanine Supplementation on the Acute Strength Performance after High-Intensity Intermittent Exercise in Recreationally Trained Men
Source: PubMed Central journal article supplement (PMC6571921; doi:10.3390/sports7050108), 2019-05-09
Supplement: sports-07-00108-s001.pdf [file sports-07-00108-s001.pdf]

Supplementary Information

# Short-Time $\beta$ -Alanine Supplementation on the Acute Strength Performance after High-Intensity Intermittent Exercise in Recreationally Trained Men

Marcelo Conrado Freitas, Jason Cholewa, Valéria Panissa, Giovanni Quizzini, João Vitor de Oliveira, Caique Figueiredo, Luis Alberto Gobbo, Erico Caperuto, Nelo Eidy Zanchi, Fabio Lira and Fabrício Eduardo Rossi

Table 1. Resistance training program.

|       | Movement                | Sets | Repetition |
|-------|-------------------------|------|------------|
| Day 1 | Bench Press             | 3    | 10–12      |
|       | Incline Dumbbell Press  | 3    | 10–12      |
|       | Peck Deck               | 3    | 10–12      |
|       | Dumbbell Overhead       | 3    | 10–12      |
|       | Lateral Dumbbell Raises | 3    | 10–12      |
|       | Lying Triceps Extension | 3    | 10–12      |
|       | Triceps Press Down      | 3    | 10–12      |
| Day 2 | Back Squat              | 3    | 10–12      |
|       | 45° Leg Press           | 3    | 10–12      |
|       | Leg Extensions          | 3    | 10–12      |
|       | Calf Raises             | 3    | 10–12      |
|       | Crunches                | 3    | 15–20      |
|       | Hanging Leg Raises      | 3    | 15–20      |
| Day 3 | Lat Pulldown            | 3    | 10–12      |
|       | T-Bar Row               | 3    | 10–12      |
|       | Cable Row               | 3    | 10–12      |
|       | Barbell Curls           | 3    | 10–12      |
|       | Scott Curls             | 3    | 10–12      |
| Day 4 | Traveling Lunges        | 3    | 10–12      |
|       | Stiff leg deadlifts     | 3    | 10–12      |
|       | Leg Curls               | 3    | 10–12      |
|       | Calf Raises             | 3    | 10–12      |
|       | Crunches                | 3    | 15–20      |
|       | Hanging Leg Raises      | 3    | 15–20      |

**Table 2.** Comparison between placebo and  $\beta$ -alanine on the dietary intake and macronutrient distribution.

| Variables                       | Placebo (n=11)     |                    | $\beta$ -alanine (n=11) |                    | Time x Group |
|---------------------------------|--------------------|--------------------|-------------------------|--------------------|--------------|
|                                 | Pre                | Post               | Pre                     | Post               |              |
| <b>Dietary Intake</b>           |                    |                    |                         |                    |              |
| Carbohydrate (g)                | 264.8 $\pm$ 107.8  | 315.5 $\pm$ 176.6  | 261.5 $\pm$ 149.7       | 249.4 $\pm$ 127.9  | 0.214        |
| Carbohydrate (g/body weight)    | 3.9 $\pm$ 2.2      | 4.5 $\pm$ 2.8      | 3.3 $\pm$ 1.7           | 3.1 $\pm$ 1.6      | 0.213        |
| Protein (g)                     | 99.4 $\pm$ 32      | 111.6 $\pm$ 25.7   | 128.6 $\pm$ 38.4        | 143.6 $\pm$ 44.5   | 0.815        |
| Protein (g/body weight)         | 1.4 $\pm$ 0.5      | 1.6 $\pm$ 0.5      | 1.6 $\pm$ 0.4           | 1.8 $\pm$ 0.6      | 0.817        |
| Lipids (g)                      | 72.7 $\pm$ 18.6    | 88.8 $\pm$ 33.1    | 65.7 $\pm$ 20.7         | 76.7 $\pm$ 29.7    | 0.693        |
| Lipids (g/body weight)          | 1 $\pm$ 0.3        | 1.2 $\pm$ 0.4      | 0.8 $\pm$ 0.3           | 1 $\pm$ 0.4        | 0.620        |
| Total Intake (kcal)             | 2123.2 $\pm$ 620.9 | 2513.4 $\pm$ 904.7 | 2209.5 $\pm$ 504.8      | 2277.0 $\pm$ 650.5 | 0.245        |
| Total Intake (kcal/body weight) | 31.1 $\pm$ 13.3    | 35.9 $\pm$ 15.6    | 28.3 $\pm$ 6.5          | 29.3 $\pm$ 10      | 0.297        |
